# Supplementary figures and images for: Harnessing nanoreactors: gelatin nanogels for human therapeutic protein delivery
Source: Royal Society of Chemistry journal article supplement (doi:10.1039/d4ma00183d), 2024-01-01

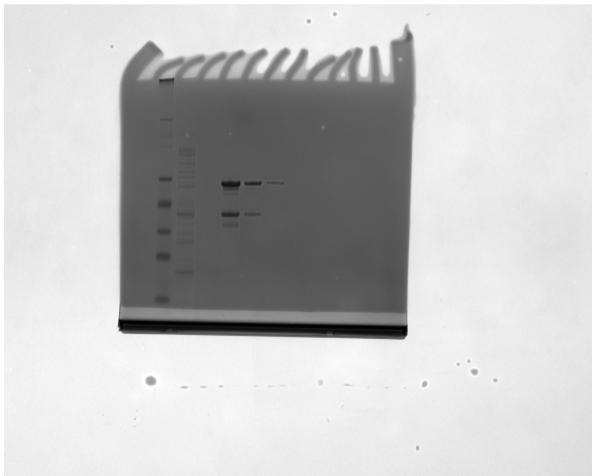

Supplement: d4ma00183d2.pdf [file d4ma00183d2.pdf]

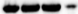

Supplement: d4ma00183d3.pdf [file d4ma00183d3.pdf]
